# Supplementary material for: Effectiveness of landscape decontamination following the Fukushima nuclear accident: a review
Source: Copernicus journal article supplement (doi:10.5194/soil-5-333-2019), 2019-12-12
Supplement: Supplementary file 1 [file soil-5-333-2019-supplement.zip]

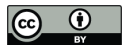

## *Supplement of*

# **Effectiveness of landscape decontamination following the Fukushima nuclear accident: a review**

**Olivier Evrard et al.**

*Correspondence to:* Olivier Evrard ([olivier.evrard@lsce.ipsl.fr](mailto:olivier.evrard@lsce.ipsl.fr))

- [soil-5-333-2019-supplement-title-page.pdf](#)
- [ICAs.kmz](#)

The copyright of individual parts of the supplement might differ from the CC BY 4.0 License.
